# Supplementary material for: A novel solvent-assisted domino Michael-aldol reaction of acenaphthenequinone with acetophenonesElectronic supplementary information (ESI) available: 1H and 13C NMR spectra for 6a–c. See http://www.rsc.org/suppdata/nj/b2/b202454c/
Source: Royal Society of Chemistry journal article supplement (doi:10.1039/b202454c), 2002-11-20
Supplement: b202454c.doc [file b202454c.doc]

# SUPPORTING INFORMATION

**A novel solvent-assisted tandem Michael-aldol reaction of acenaphthenequinone with acetophenones**

Jean J. Vadakkan, Vidya Raman, Noeline B. Fernandez, Sreedharan Prathapan, and Binoy Jose*

Department of Applied Chemistry, Cochin University of Science and Technology, Kochi – 682 022, India

Binoy@cusat.ac.in


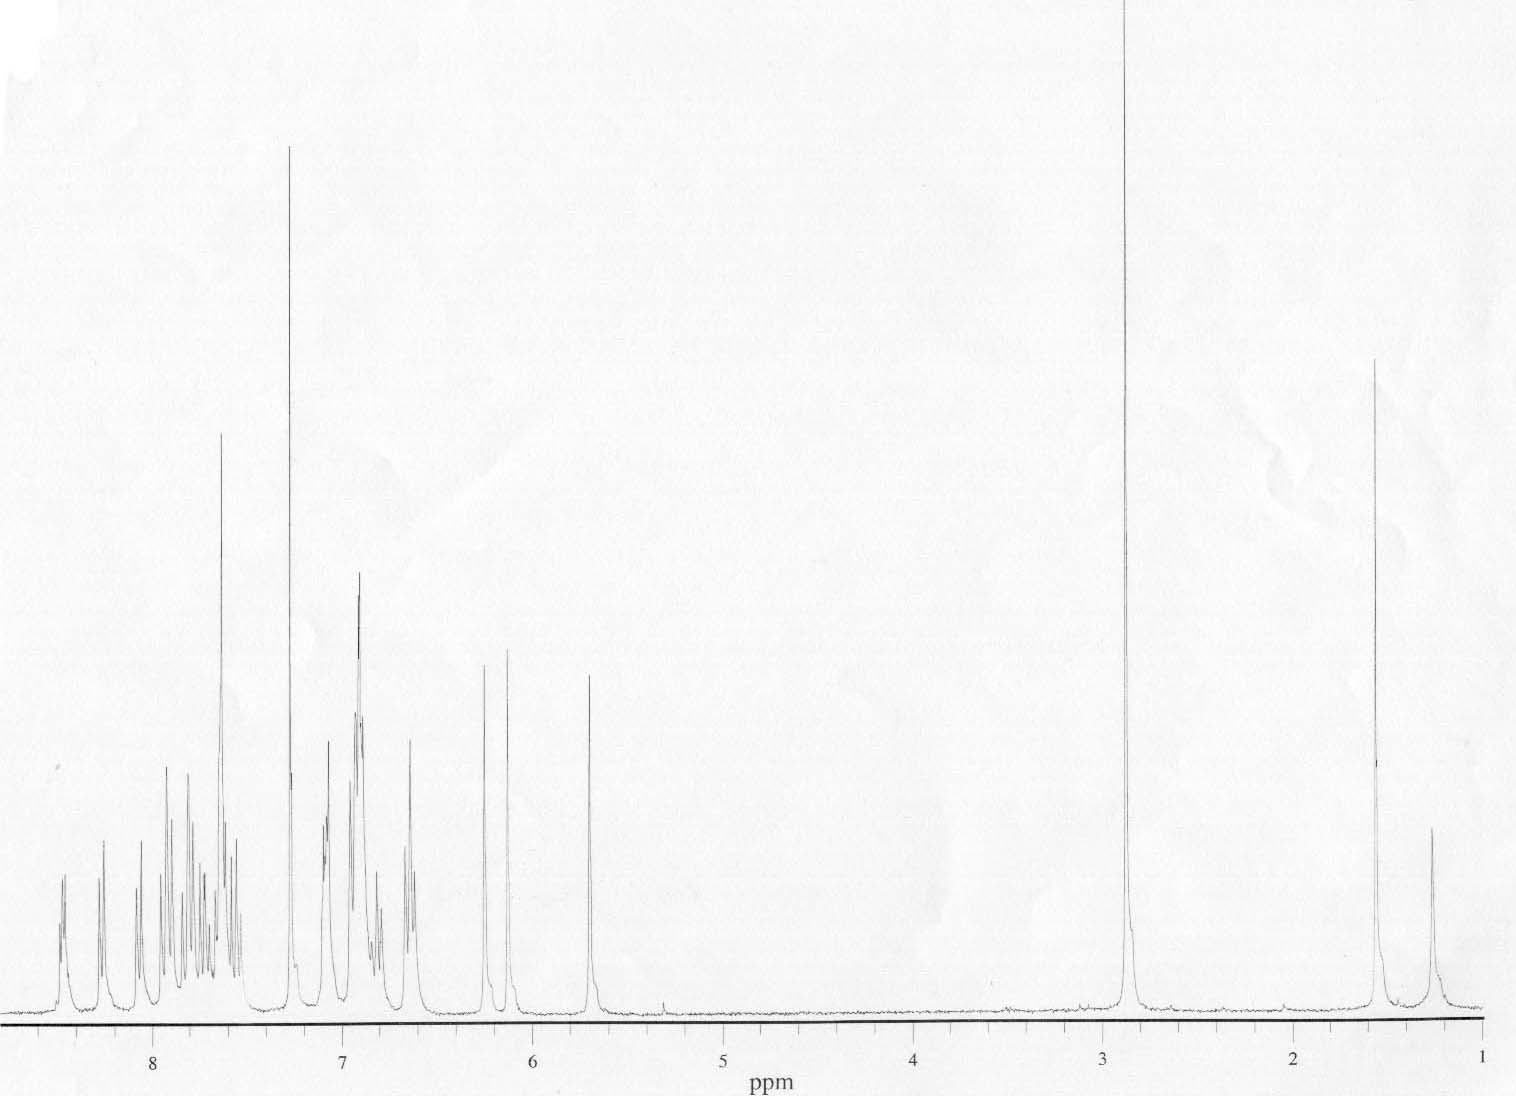


1H NMR spectrum of 6a


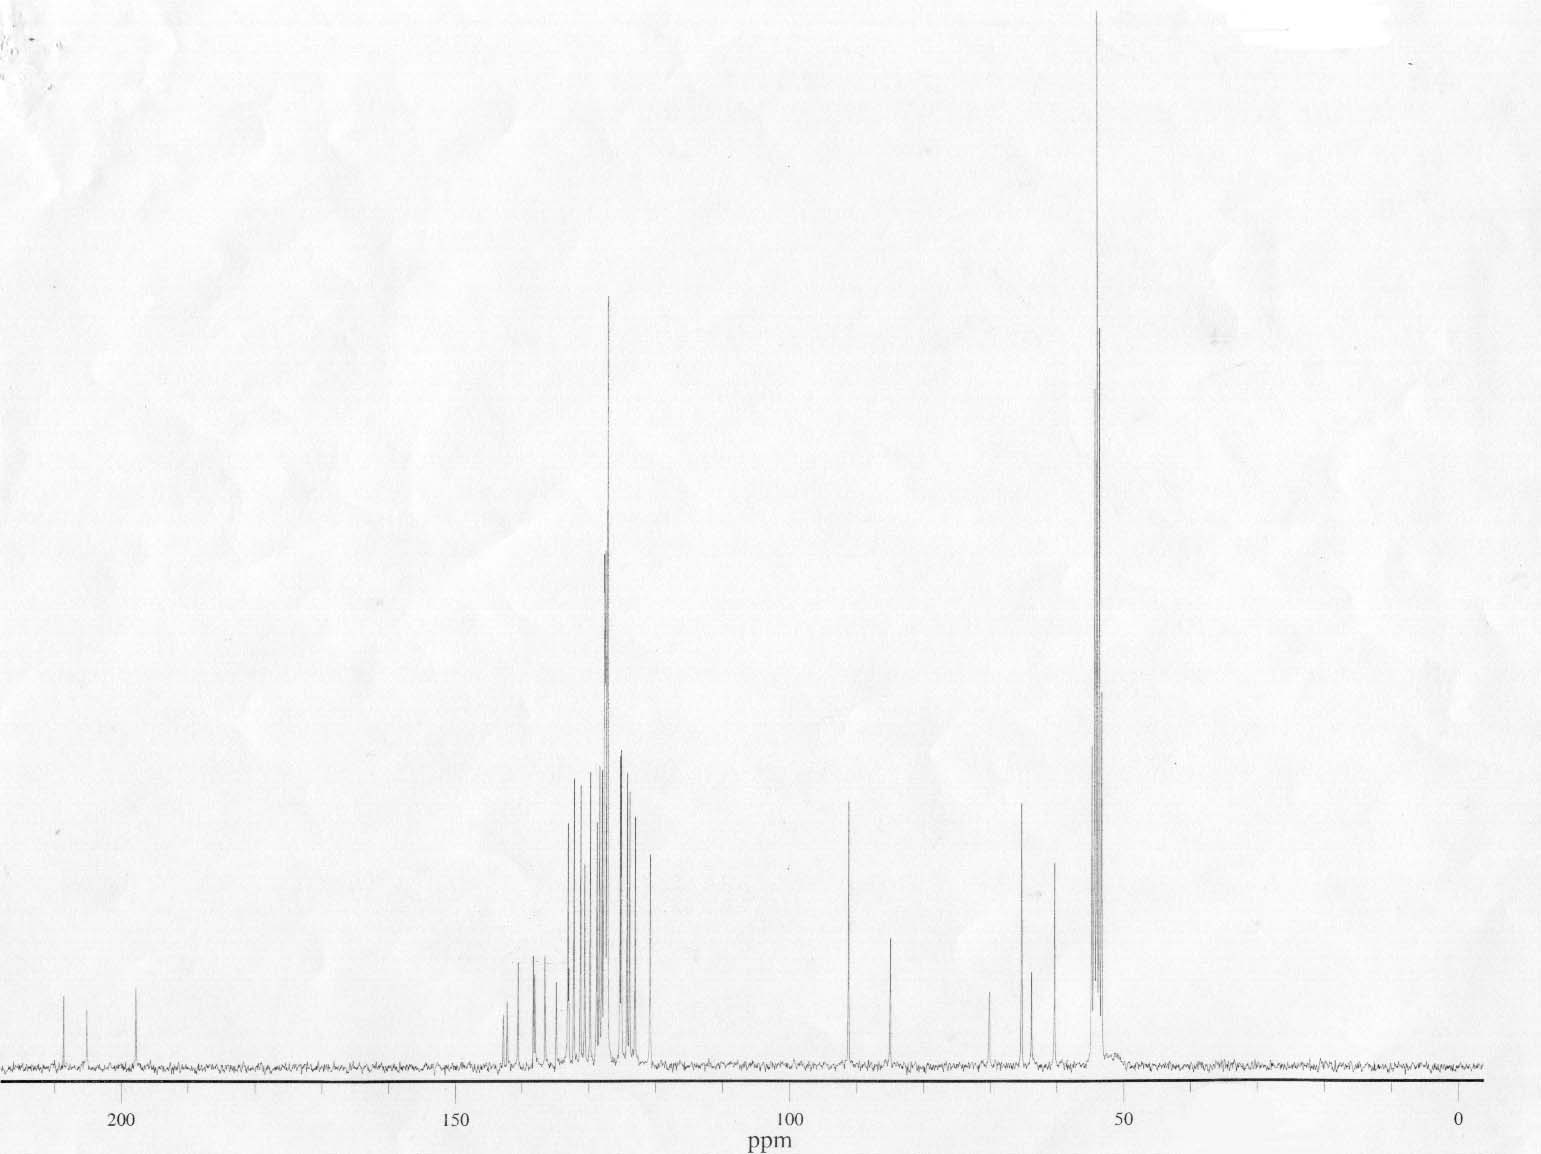


13C NMR spectrum of 6a


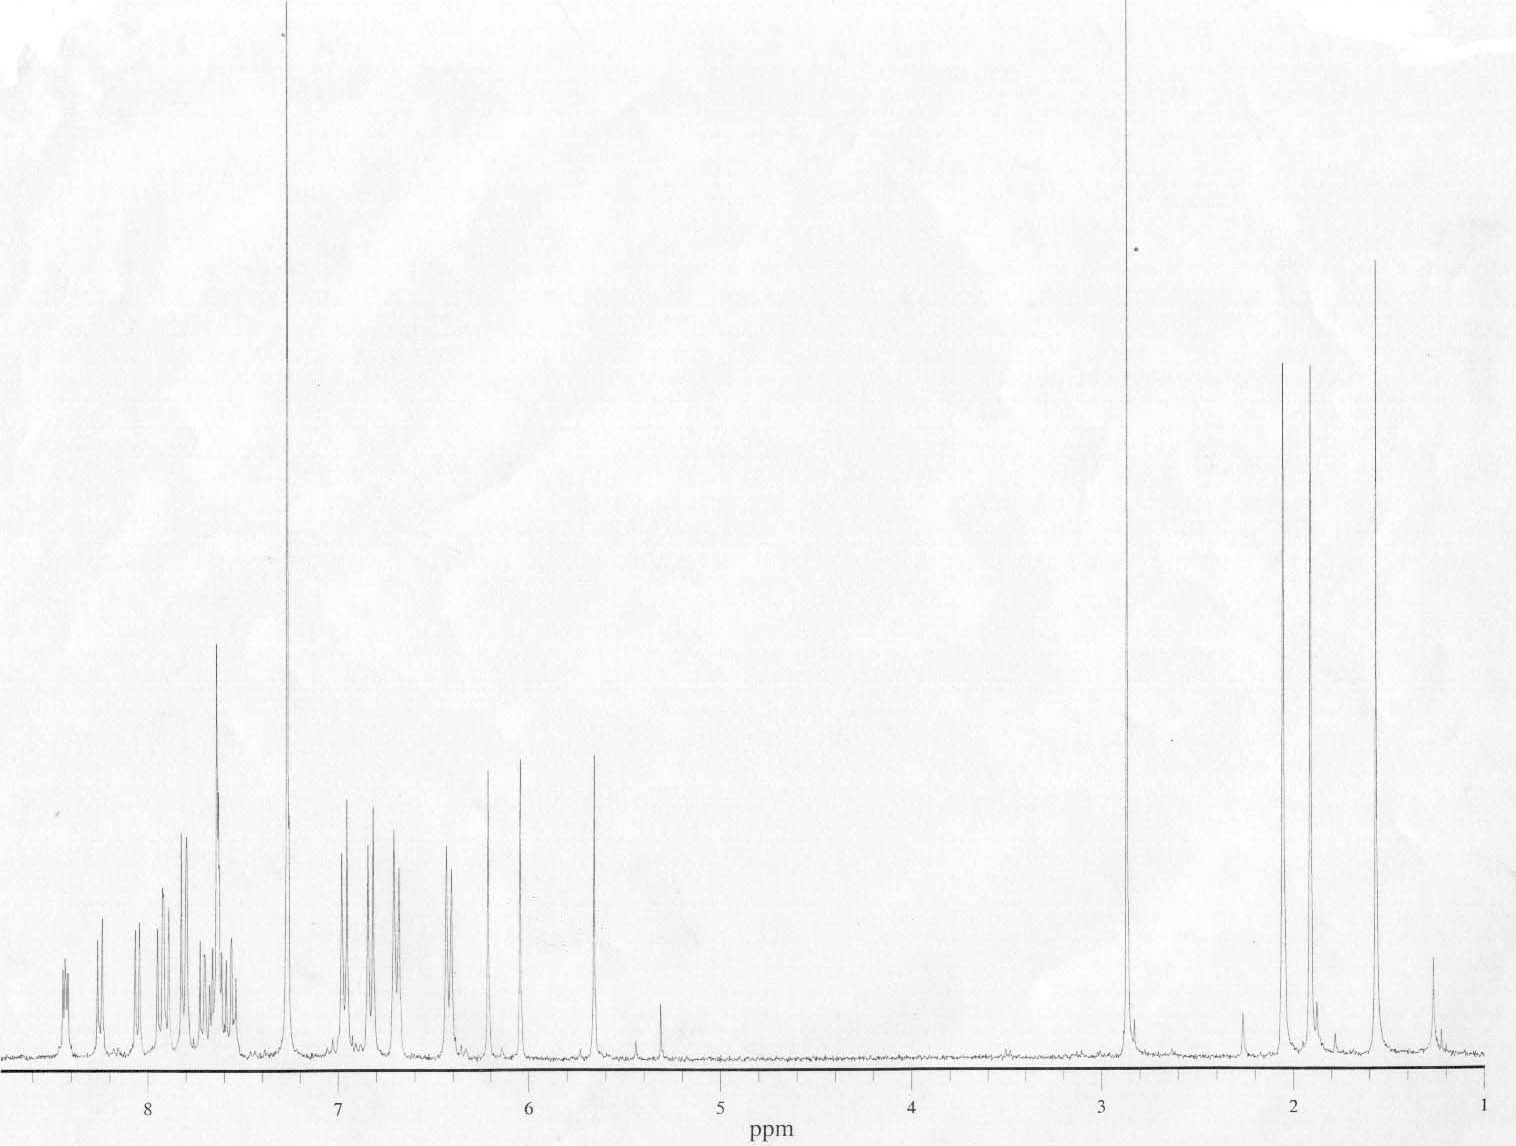


1H NMR spectrum of 6b


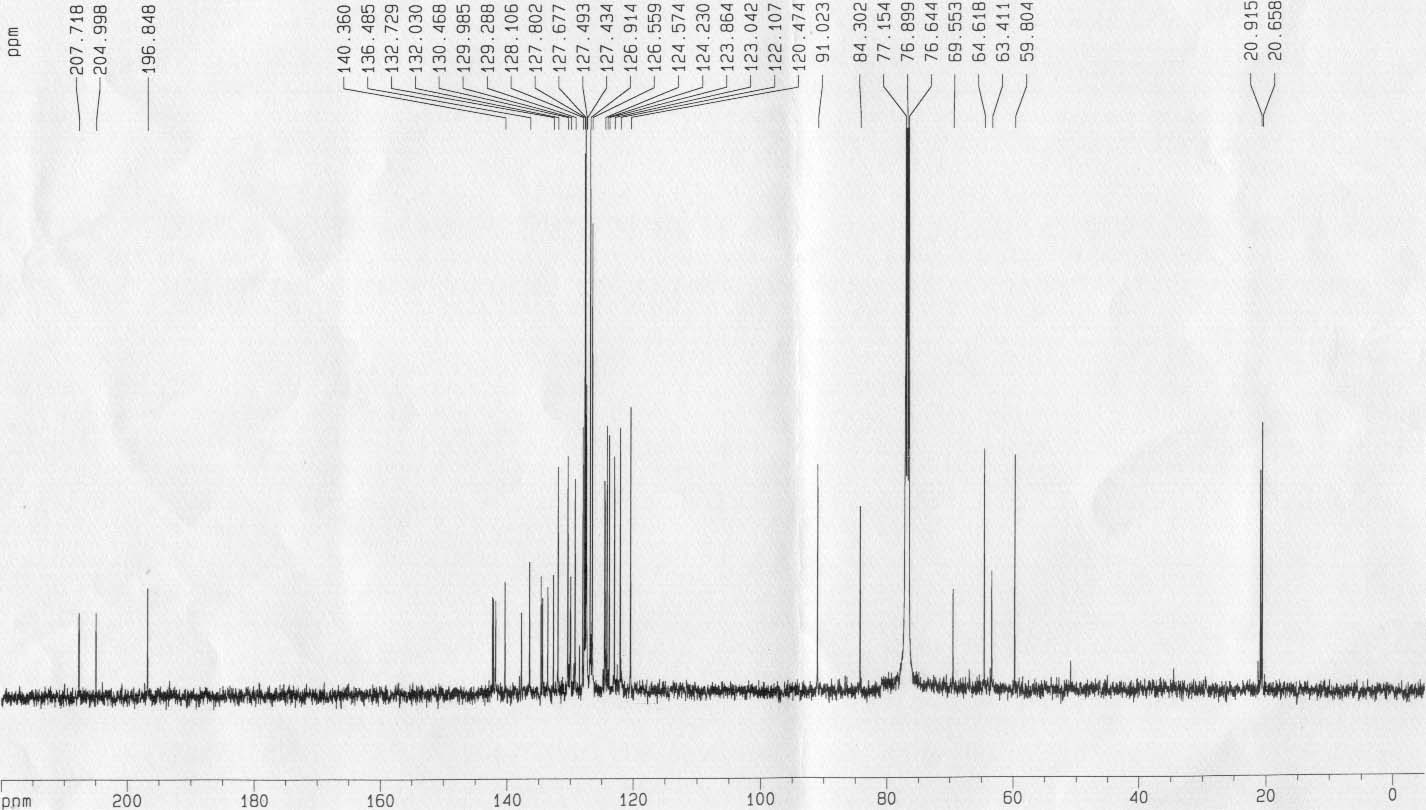


13C NMR spectrum of 6b


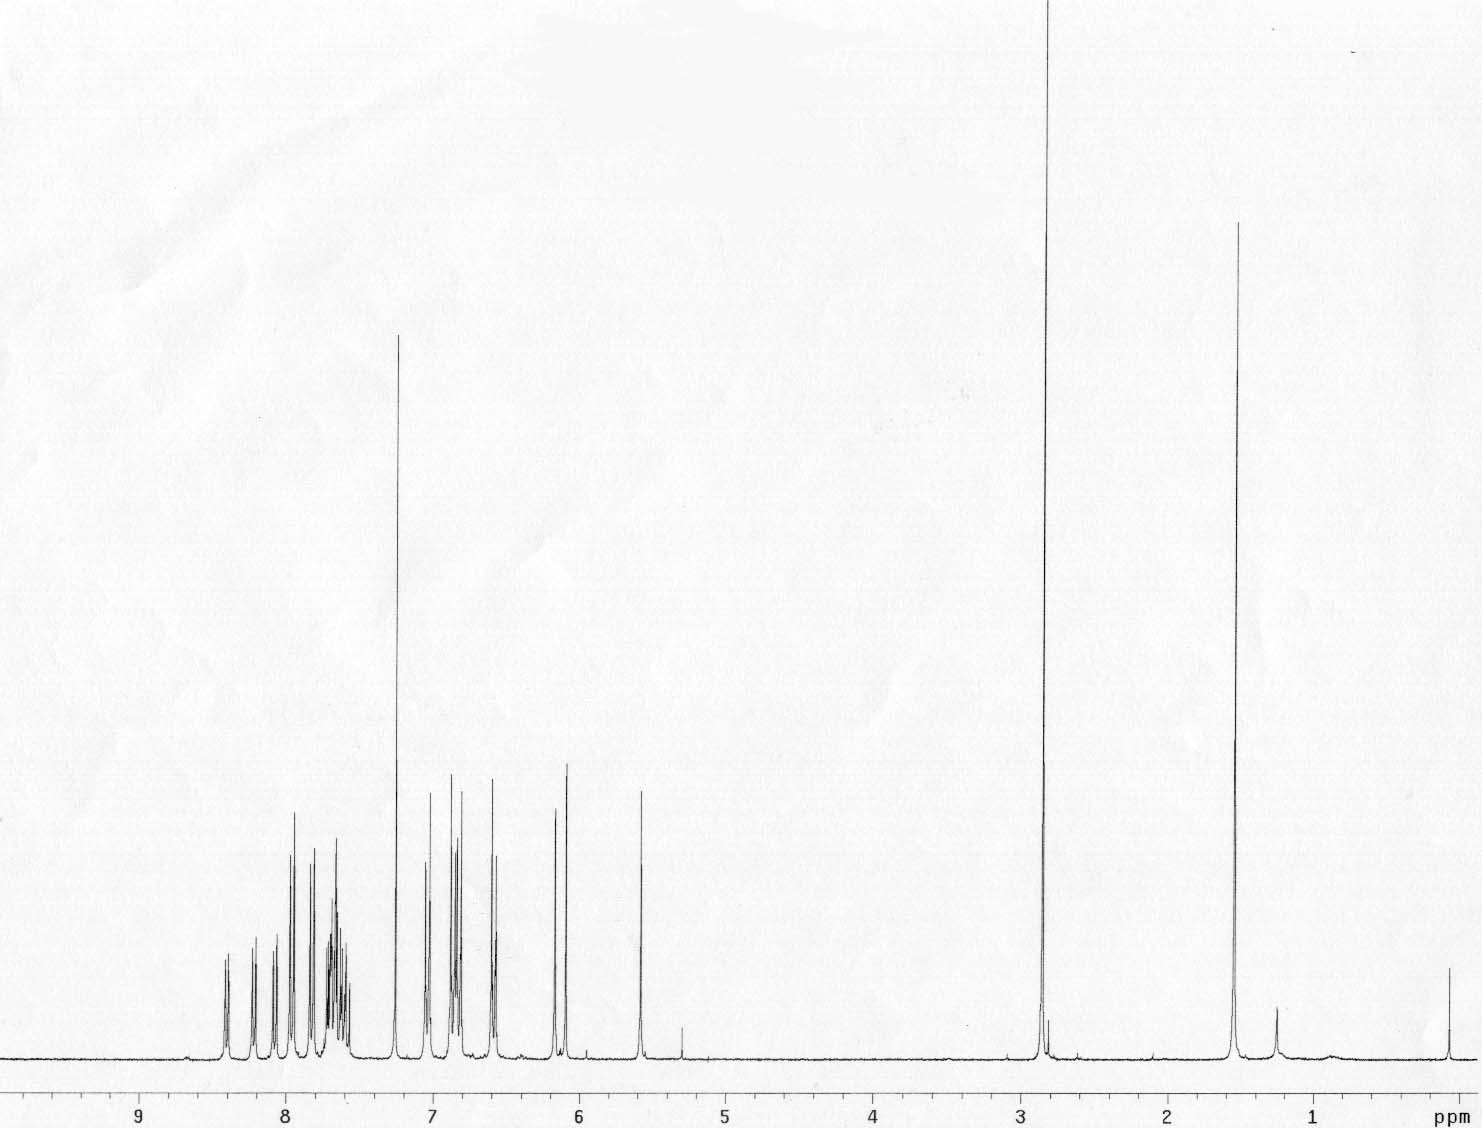


1H NMR spectrum of 6c


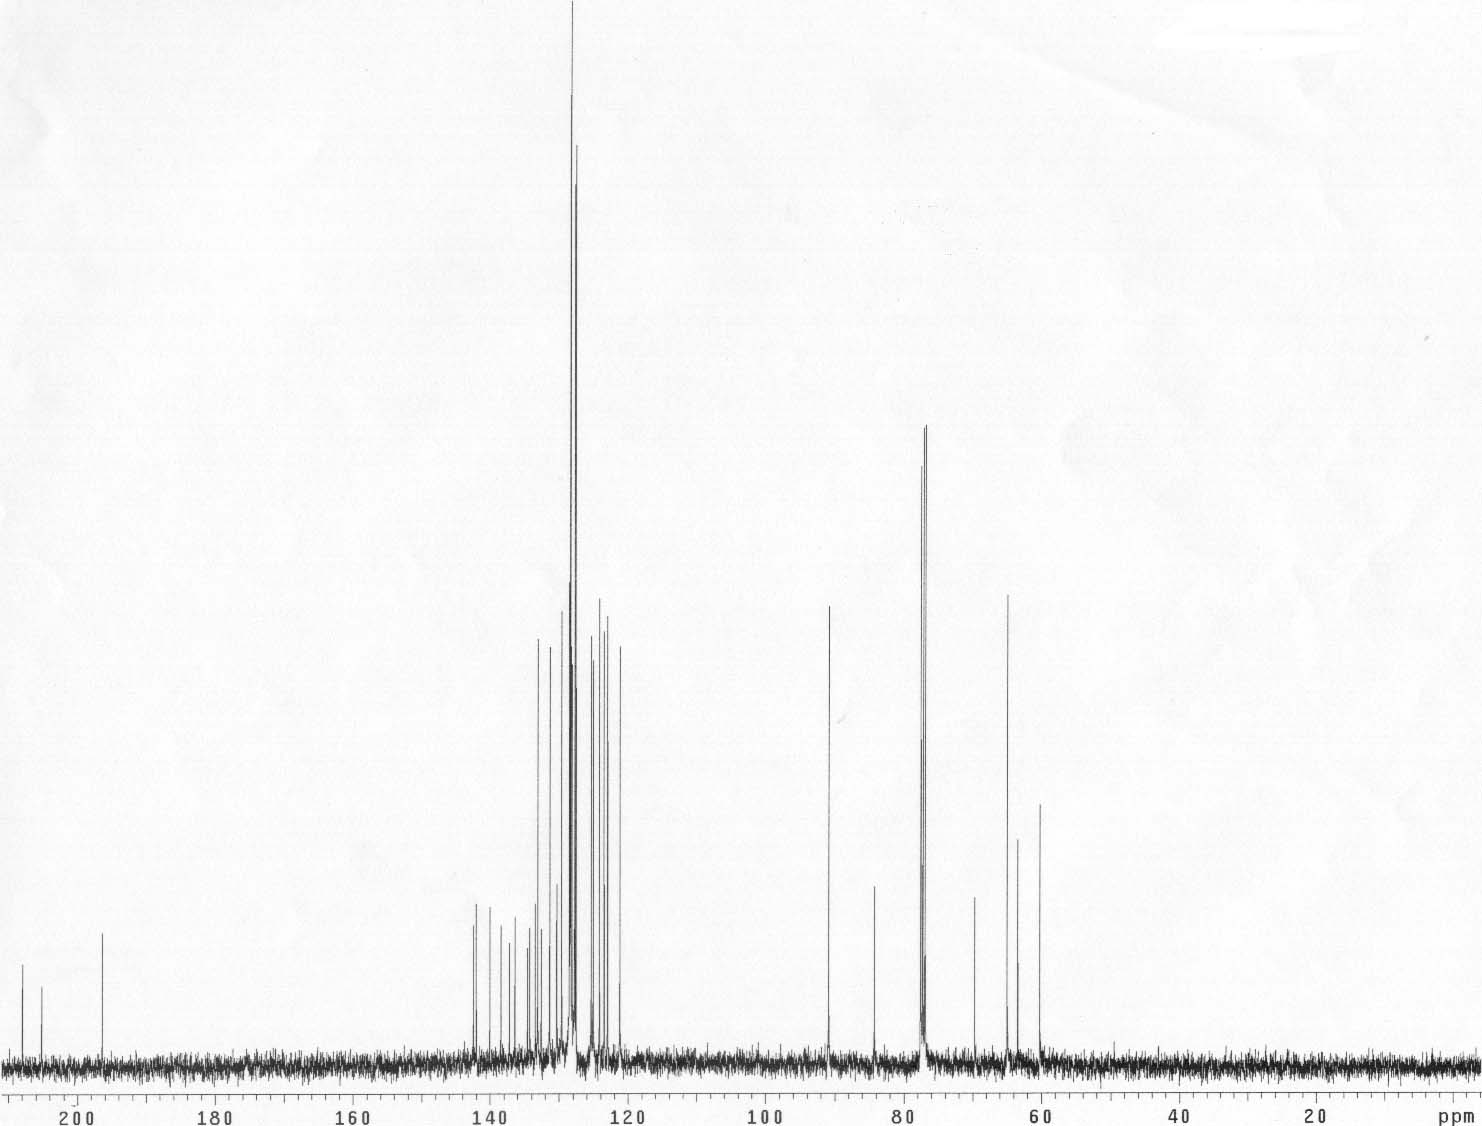


13C NMR spectrum of 6c
